# Supplementary material for: Photoluminescent Histidine-Stabilized Gold Nanoclusters as Efficient Sensors for Fast and Easy Visual Detection of Fe Ions in Water Using Paper-Based Portable Platform
Source: MDPI journal article supplement (doi:10.3390/ijms232012410), 2022-10-17
Supplement: s1 [file s1]

## Electronic Supplementary Information

### Photoluminescent histidine-stabilized gold nanoclusters as efficient sensors for fast and easy visual detection of Fe ions in water using paper-based portable platform

Alexandru-Milentie Hada<sup>a,b,†</sup>, Markus Zetes<sup>a,b,†</sup>, Monica Focsan<sup>a</sup>, Simion Astilean<sup>a,b</sup>, Ana-Maria Craciun<sup>a,\*</sup>

<sup>a</sup>Nanobiophotonics and Laser Microspectroscopy Center, Interdisciplinary Research Institute in Bio-Nano-Sciences, Babes-Bolyai University, 42 T. Laurian Str., 400271, Cluj-Napoca, Romania

<sup>b</sup>Faculty of Physics, Babes-Bolyai University, 1 M. Kogalniceanu str., 400084, Cluj-Napoca, Romania

<sup>†</sup>These authors contributed equally

\*Corresponding author: ana.gabudean@ubbcluj.ro

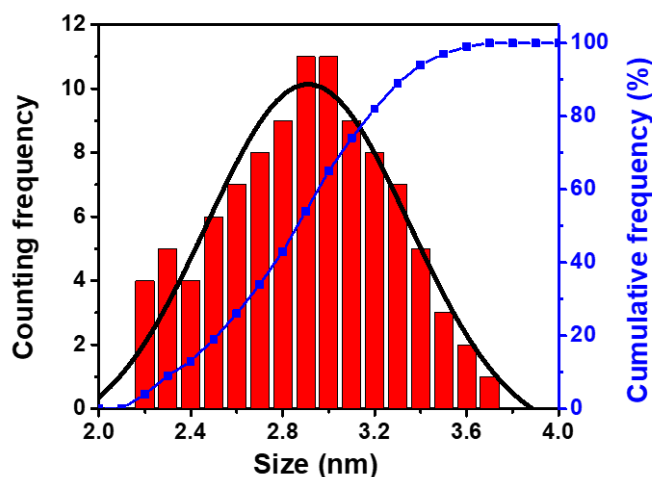

**Figure S1.** The size histogram of His-AuNCs with the corresponding counting and cumulative frequencies.

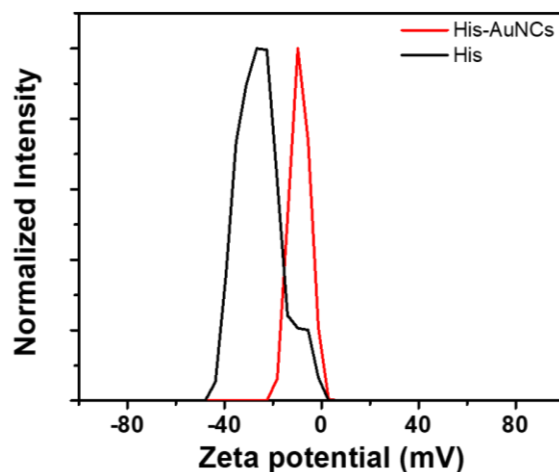

**Figure S2.** The zeta-potential of His and His-AuNCs.

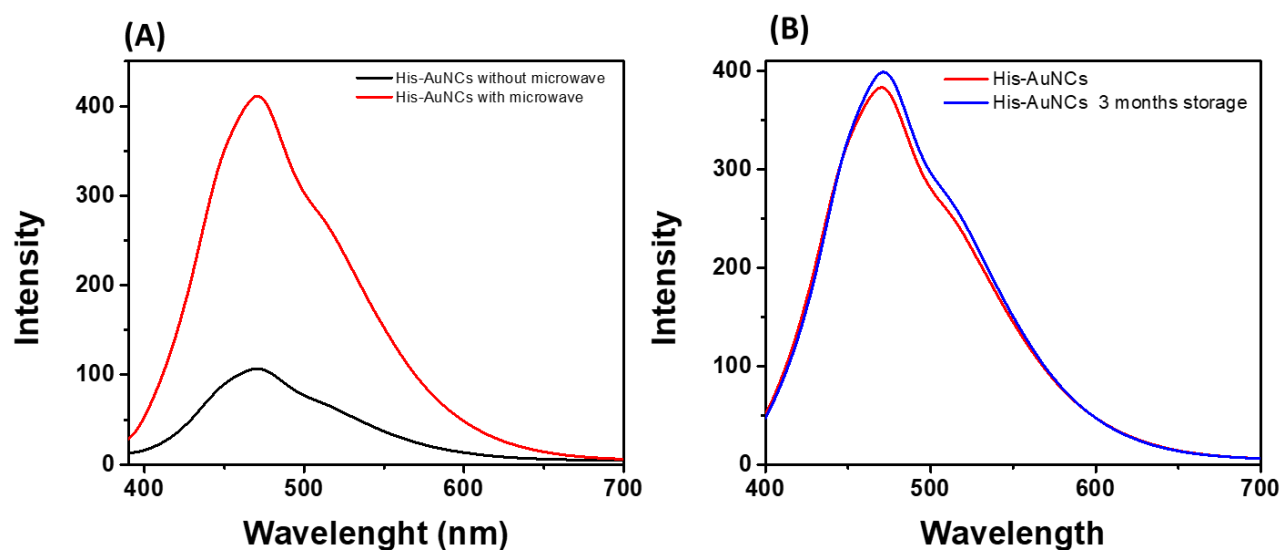

**Figure S3.** (A) The PL emission of His-AuNCs synthesized with and without microwaves. (B) The PL emission of His-AuNCs immediately after the synthesis and after 3 months of storage. Excitation wavelength: 380 nm.

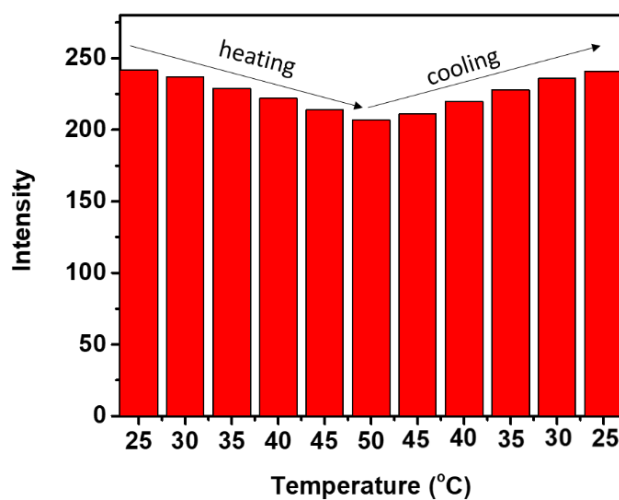

**Figure S4.** The temperature-dependent behavior of the His-AuNCs' PL. The intensity was recorded at 471 nm under 380 nm excitation.

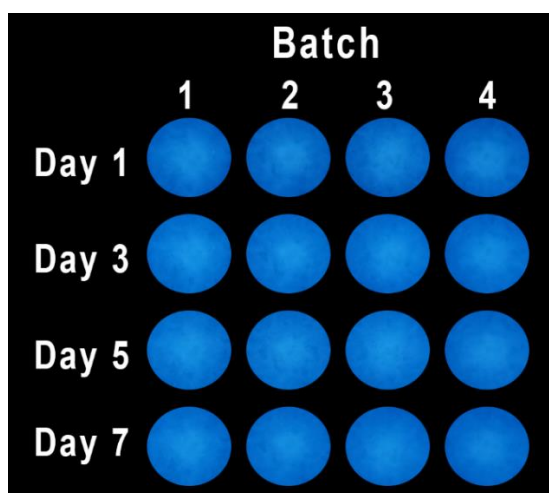

**Figure S5.** Photographic pictures of different batches of the paper sensing platform evaluated after 1, 3, 5 and 7 days of storage.

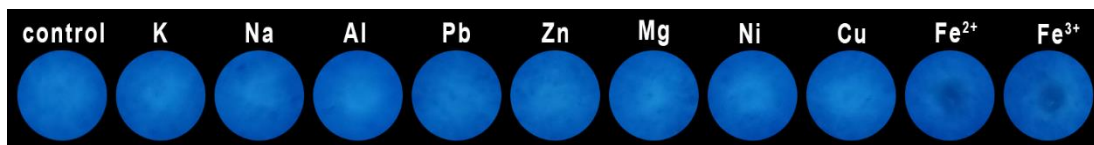

**Figure S6.** Photographic pictures of the paper sensing platform after interaction with common metallic ions (K, Na, Al, Pb, Mg, Ni, Zn, Cu,  $\text{Fe}^{2+}$ ,  $\text{Fe}^{3+}$ ) obtained in the selectivity assay.

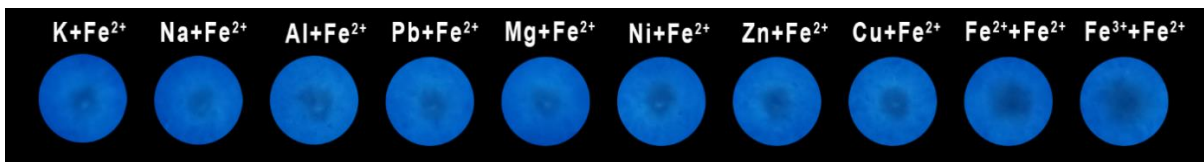

**Figure S7.** Photographic pictures of the paper sensing platform after interaction with a mixture of  $\text{Fe}^{2+}$  and different metallic ions (K, Na, Al, Pb, Mg, Ni, Zn, Cu,  $\text{Fe}^{2+}$ ,  $\text{Fe}^{3+}$ ) obtained in the competitiveness assay.

**Table S1.** Recovery tests for  $\text{Fe}^{2+}$  (35  $\mu\text{M}$ ) in the presence of different metallic ions (35  $\mu\text{M}$ ) obtained after the analysis of the quenching effect observed in the photographic pictures from Figure S7.

| Type of ion      | Found ( $\mu\text{M}$ ) | Recovered (%)   |
|------------------|-------------------------|-----------------|
| K                | $34.1 \pm 0.7$          | $97.4 \pm 2.0$  |
| Na               | $33.5 \pm 0.4$          | $95.7 \pm 1.1$  |
| Al               | $36.4 \pm 0.7$          | $104.0 \pm 2.0$ |
| Pb               | $34.5 \pm 0.5$          | $98.5 \pm 1.4$  |
| Mg               | $31.7 \pm 0.7$          | $90.5 \pm 2.0$  |
| Ni               | $34.7 \pm 0.7$          | $99.1 \pm 2.0$  |
| Zn               | $34.3 \pm 0.8$          | $98.0 \pm 2.2$  |
| Cu               | $33.1 \pm 1.01$         | $94.5 \pm 2.9$  |
| $\text{Fe}^{2+}$ | $70.1 \pm 1.3$          | $200.2 \pm 3.7$ |
| $\text{Fe}^{3+}$ | $68.3 \pm 1.1$          | $195.1 \pm 3.1$ |
